# Supplementary material
Source: PubMed Central journal article supplement (PMC1559823)
Supplement: rspb20053099s03.pdf [file rspb20053099s03.pdf]

# ELECTRONIC APPENDIX

This is the Electronic Appendix to the article

Brain size, innovative propensity and migratory behaviour in temperate Palearctic birds

by

Daniel Sol, Louis Lefebvre and J. Domingo Rodríguez-Teijeiro

*Proc. R. Soc. B* ([doi:10.1098/rspb.2005.3099](https://doi.org/10.1098/rspb.2005.3099))

Electronic appendices are refereed with the text; however, no attempt is made to impose a uniform editorial style on the electronic appendices.

Sol and others, Electronic appendices accompanying the ms

***Brain size, innovative propensity and migratory behaviour in temperate Palearctic birds***

Table 1. Percentage of variance in migratory strategy, innovation frequency (adjusted for research effort) and relative brain size explained at different taxonomic levels, based on a variance component analysis.

|             | Migratory strategy | Innovation rate | Relative brain size |
|-------------|--------------------|-----------------|---------------------|
| Parvorder   | 4.5                | 7.7             | 13.2                |
| Superfamily | 0.0                | 10.1            | 8.6                 |
| Family      | 49.0               | 0.0             | 34.0                |
| Genus       | 24.5               | 6.9             | 17.7                |
| Species     | 21.9               | 75.3            | 26.5                |

Table 2. Relationship between foraging innovation rate and migratory strategies (residents + SD migrants vs. LD migrants vs), while adjusting for potential confounding variables. The relationship is tested with a GLMM with binomial error and logit link, which includes family as random factor to control for taxonomic effects. The minimum adequate model includes all significant fixed effects at  $P < 0.05$ . The  $p$ -values that remain significant under Bonferroni standards are shown in bold.

| Variable                  | Estimate | Standard Error | $T_{101}$ | $P$           |
|---------------------------|----------|----------------|-----------|---------------|
| Innovation rate           | -3.746   | 0.927          | -4.04     | <b>0.0001</b> |
| Mid-latitude of the range | 11.761   | 4.838          | 2.43      | 0.0168        |
| Ground feeding            | -1.540   | 0.586          | -2.63     | <b>0.0099</b> |
| Conifer specialist        | -4.138   | 1.442          | -2.87     | <b>0.0051</b> |
| Body mass                 | -3.135   | 1.086          | -2.89     | <b>0.0047</b> |
| Insectivorous diet        | 1.594    | 0.671          | 2.38      | 0.0194        |

Table 3. Relationship between brain size, relative to body size, and migratory strategies (i.e. residents, SD migrants and LD migrants), while adjusting for potential confounding variables. The relationship is tested with a GLMM with ordinal error, which includes family as random factor to control for taxonomic effects. The minimum adequate model includes all significant fixed effects at  $P < 0.05$ . The  $p$ -values that remain significant under Bonferroni standards are shown in bold.

---

| Variable            | Estimate | Standard Error | $Z$   | $p$                |
|---------------------|----------|----------------|-------|--------------------|
| Relative brain size | -2.745   | 0.817          | 3.36  | <b>0.0008</b>      |
| Conifer specialist  | 1.579    | 0.719          | -2.19 | 0.0282             |
| Insectivorous diet  | -2.854   | 0.636          | 4.48  | <b>&lt; 0.0001</b> |
| Clutch size         | -0.428   | 0.216          | 1.98  | 0.0474             |

---
